# Supplementary material for: A Novel Model of Staphylococcus aureus-Induced Lymphoplasmacytic Rhinosinusitis in Rats
Source: MDPI journal article supplement (doi:10.3390/ijms25063336), 2024-03-15
Supplement: s1 [file s1]

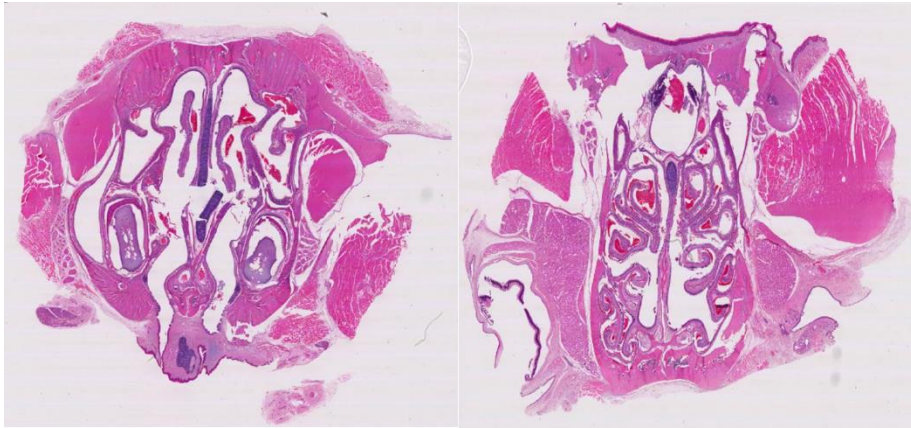

Supplementary Figure S1. Anterior (Left) and posterior (Right) sections of the rat nasal cavity in H&E staining.

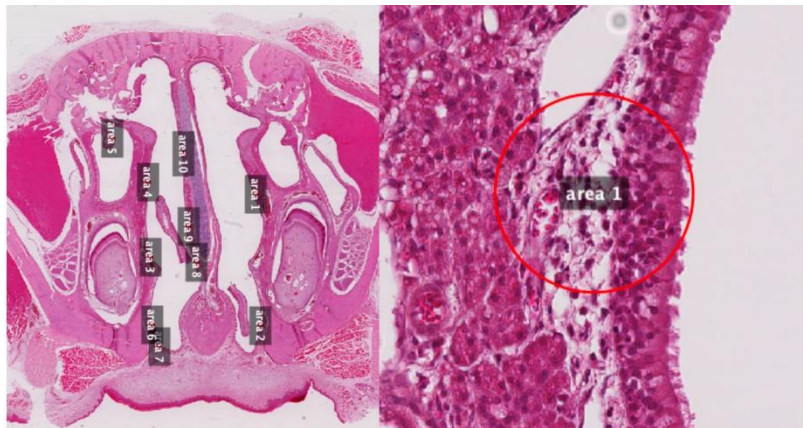

Supplementary Figure S2. A completely labelled slide of areas of maximal inflammation mapped (Left). A labelled area of maximal infiltrate (Right).

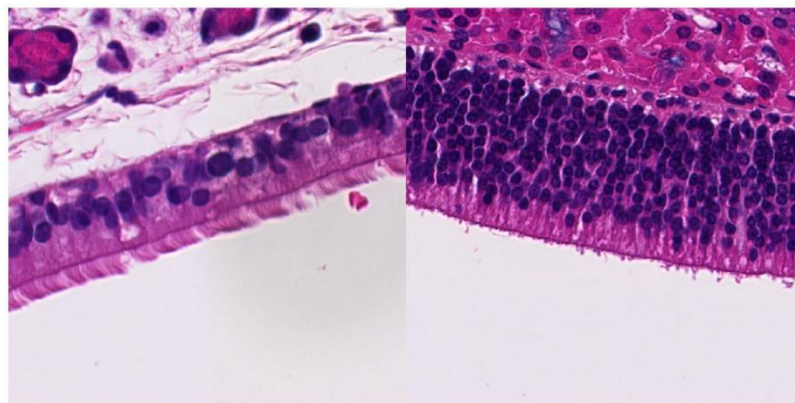

Supplementary Figure S3. Respiratory epithelium (Left) and olfactory epithelium inflammation (Right)

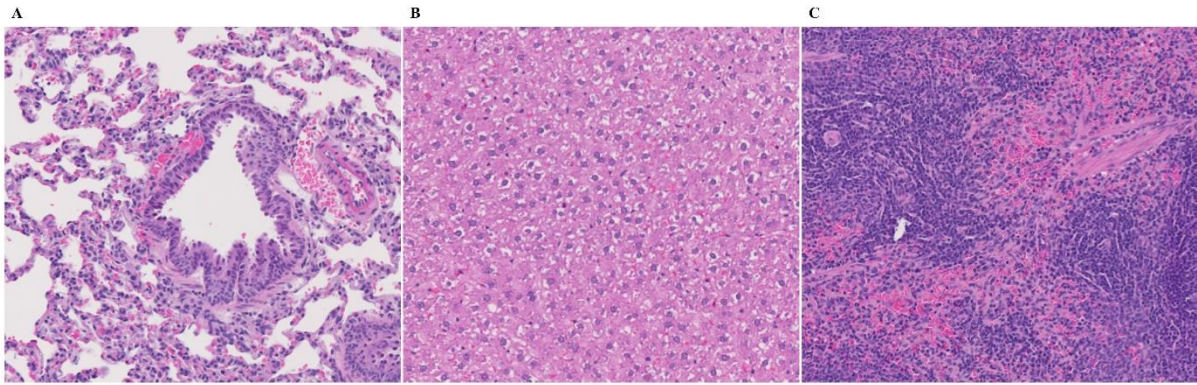

**Supplementary Figure S4. (A) Lung histology with non-specific bronchioalveolar infiltrate. (B) Liver histology. (C) Spleen histology.**

**Supplementary Table S1. Long read sequences.**

| Group      | Sequence type |
|------------|---------------|
| Exoprotein | Type 976      |
| CI908      | Type 1290     |
| CI913      | Type 976      |
| CI182      | Type 20       |
